# Supplementary material for: The association of tryptophan and phenylalanine are associated with arsenic-induced skin lesions in a Chinese population chronically exposed to arsenic via drinking water: a case–control study
Source: PubMed Central journal article supplement — BMJ Open. 2019 Oct 30;9(10):e025336. doi: 10.1136/bmjopen-2018-025336 (PMC6830718; doi:10.1136/bmjopen-2018-025336), 2019-10-30
Supplement: bmjopen-2018-025336supp001.pdf [file bmjopen-2018-025336supp001.pdf]

**Table S1** Amino acids metabolites in serum.

| Amino acids               | Quartile | Quartile Range        | Number |
|---------------------------|----------|-----------------------|--------|
| Tryptophan                | 1        | 1015821.54-1555040.97 | 28     |
|                           | 2        | 1555370.88-1701256.07 | 28     |
|                           | 3        | 1704298.84-1937437.56 | 28     |
|                           | 4        | 1945755.37-2492319.05 | 28     |
| Phenylalanine             | 1        | 1044964.46-1516708.76 | 28     |
|                           | 2        | 1519993.60-1649420.82 | 28     |
|                           | 3        | 1659818.85-1908125.28 | 28     |
|                           | 4        | 1929946.22-3489918.62 | 28     |
| Leucine                   | 1        | 379957.04-556314.46   | 28     |
|                           | 2        | 558744.08-688759.83   | 28     |
|                           | 3        | 689470.83-806033.16   | 28     |
|                           | 4        | 821492.90-1356991.53  | 28     |
| Phenylalanylphenylalanine | 1        | 608200.15-1291853.09  | 27     |
|                           | 2        | 1303597.59-1632678.66 | 29     |
|                           | 3        | 1638204.36-2234283.97 | 28     |
|                           | 4        | 2235250.29-5011775.70 | 28     |

**Table S2** Variance inflation factor of amino acids in different models<sup>‡</sup>.

| Amino acids               | Model 1 | Model 2 | Model 3 | Model 4 |
|---------------------------|---------|---------|---------|---------|
| Tryptophan                | 1.04    | 1.04    | 1.04    | 1.04    |
| Phenylalanine             | 4.56    |         | 1.50    | 1.04    |
| Leucine                   | 4.21    | 1.39    |         |         |
| Phenylalanylphenylalanine | 1.49    | 1.38    | 1.48    |         |

<sup>‡</sup>Model 1: Tryptophan, Phenylalanine, Leucine and Phenylalanyl Phenylalanine;

Model 2: Tryptophan, Leucine and Phenylalanyl Phenylalanine;

Model 3: Tryptophan, Phenylalanine and Phenylalanylphenylalanine;

Model 4: Tryptophan and Phenylalanine.
